# Supplementary material for: High-valence chromium accelerated interface electron transfer for water oxidation
Source: Royal Society of Chemistry journal article supplement (doi:10.1039/d2dt02908a), 2022-01-01
Supplement: d2dt02908a1.pdf [file d2dt02908a1.pdf]

## Supporting Information

### High-valence chromium accelerated interface electron transfer for water oxidation

Shaoxi Kong,<sup>a†</sup> Mengfei Lu,<sup>a,b†</sup> Shicheng Yan,<sup>a\*</sup> and Zhigang Zou<sup>a,b</sup>

<sup>a</sup>Collaborative Innovation Center of Advanced Microstructures, Eco-materials and Renewable Energy Research Center (ERERC), College of Engineering and Applied Sciences, Nanjing University, No. 22, Hankou Road, Nanjing, Jiangsu 210093, P. R. China.

<sup>b</sup>National Laboratory of Solid State Microstructures, Jiangsu Key Laboratory for Nano Technology, School of Physics, Nanjing University, No. 22 Hankou Road, Nanjing, Jiangsu 210093, P. R. China.

\* Corresponding Author E-mail: yscfei@nju.edu.cn (S. C. Yan)

† These authors contributed equally to this work.

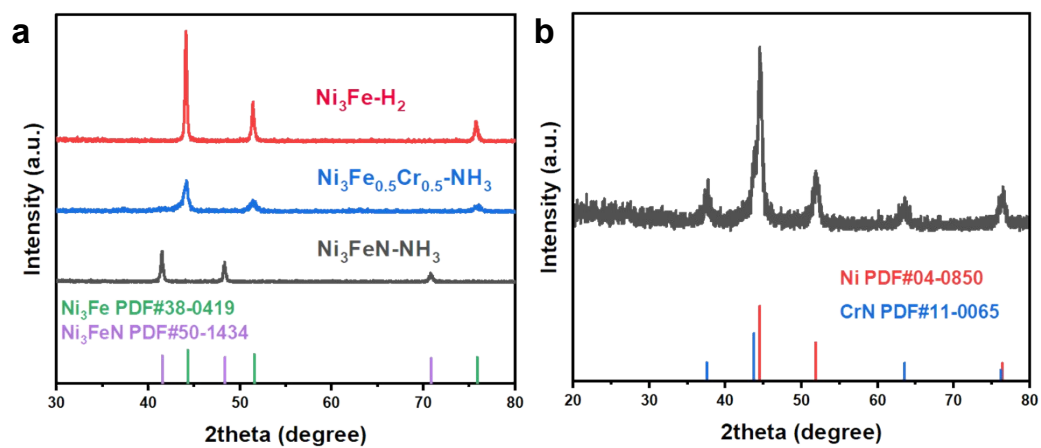

**Fig S1.** (a) XRD patterns of  $\text{Ni}_3\text{Fe}_{0.5}\text{Cr}_{0.5}\text{-NH}_3$ ,  $\text{Ni}_3\text{Fe-H}_2$  and  $\text{Ni}_3\text{FeN-NH}_3$ . (b) XRD pattern of  $\text{Ni}_3\text{Cr-NH}_3$ .

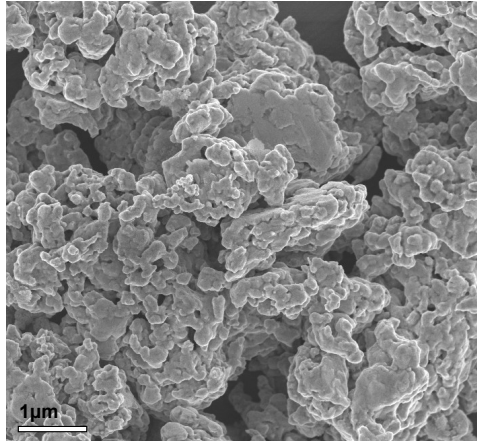

**Fig S2.** SEM image of Ni<sub>3</sub>Fe.

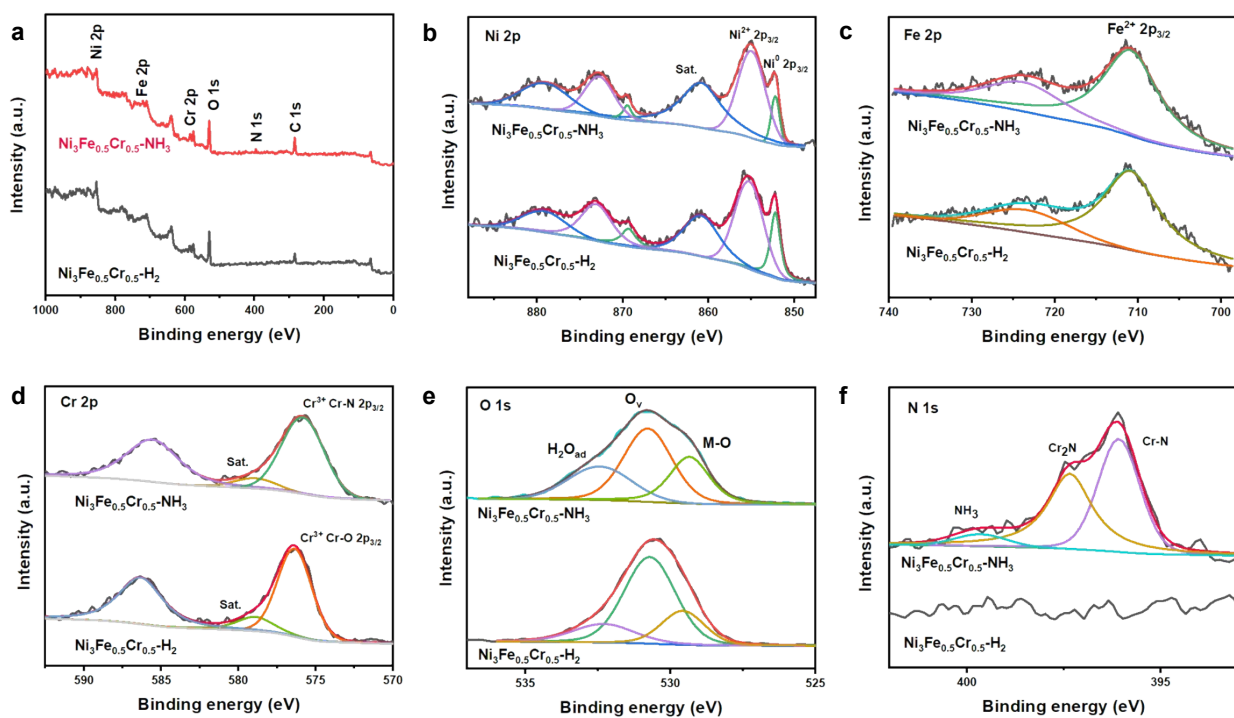

**Fig S3.** XPS spectra. (a) Survey spectra, (b) Ni 2p, (c) Fe 2p, (d) Cr 2p, (e) O 1s and (f) N 1s for  $\text{Ni}_3\text{Fe}_{0.5}\text{Cr}_{0.5}\text{-NH}_3$  and  $\text{Ni}_3\text{Fe}_{0.5}\text{Cr}_{0.5}\text{-H}_2$ .

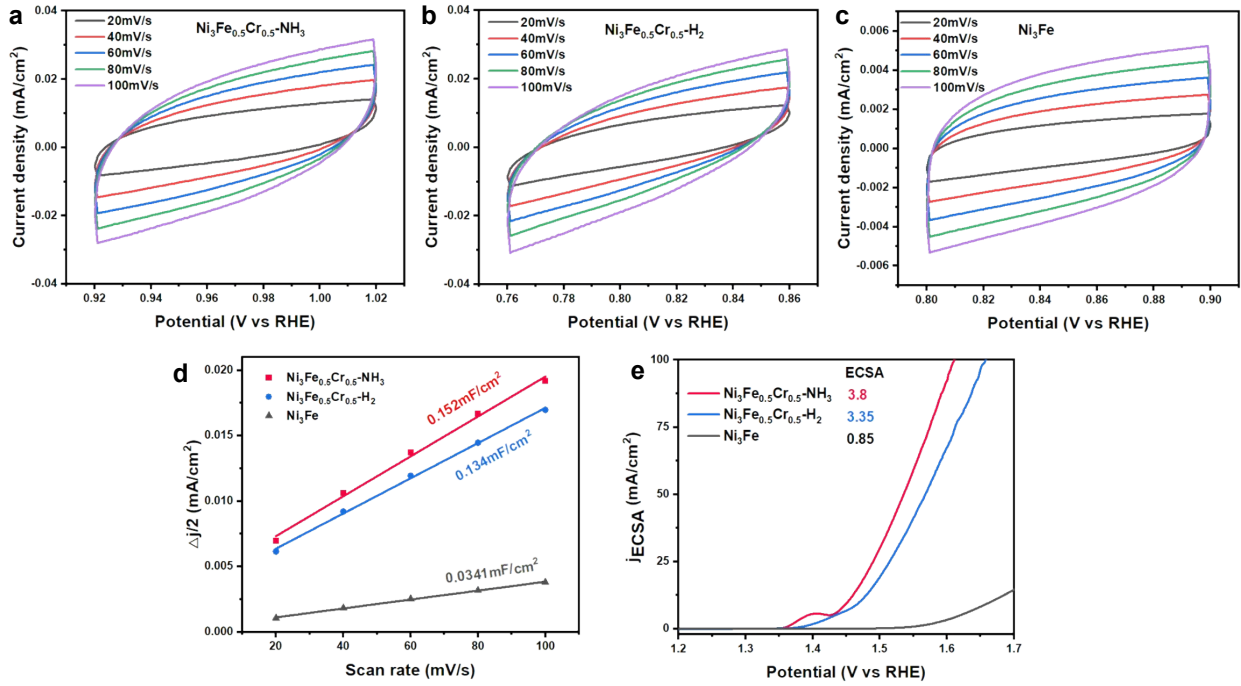

**Fig S4.** CV curves with different scan rates in non-faradic region. (a)  $\text{Ni}_3\text{Fe}_{0.5}\text{Cr}_{0.5}\text{-NH}_3$ , (b)  $\text{Ni}_3\text{Fe}_{0.5}\text{Cr}_{0.5}\text{-H}_2$ , (c)  $\text{Ni}_3\text{Fe}$  at various scan rates (20, 40, 60, 80 and 100 mV/s) in 1.0 M KOH for OER. (d) Plots of capacitive current density versus scan rate. The slopes represent  $C_{dl}$ . (e) LSV curves normalized by ECSA of the as-prepared samples. The ECSA was calculated by double-layer capacitance.

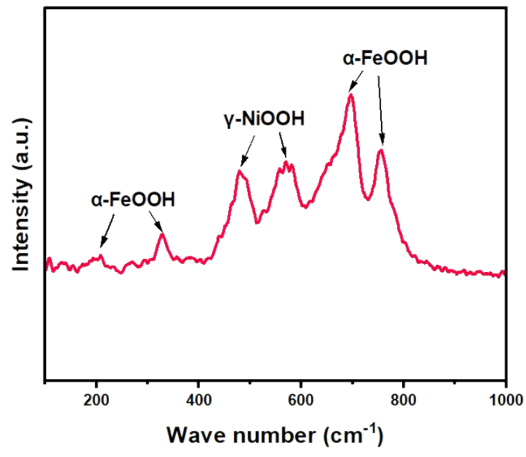

**Fig S5.** Raman spectrum of  $\text{Ni}_3\text{Fe}_{0.5}\text{Cr}_{0.5}\text{-NH}_3$  after OER.

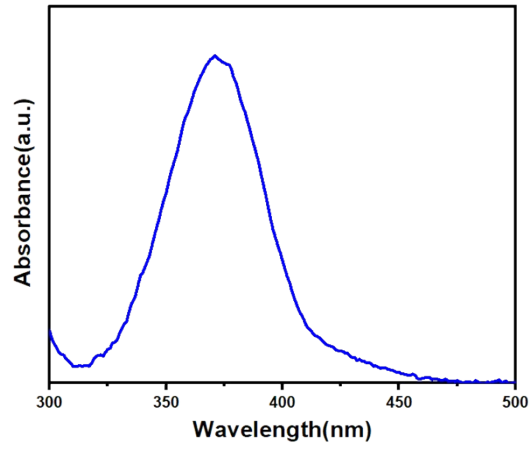

**Fig S6.** UV-vis spectroscopy of the electrolyte after the chronoamperometry measurement.

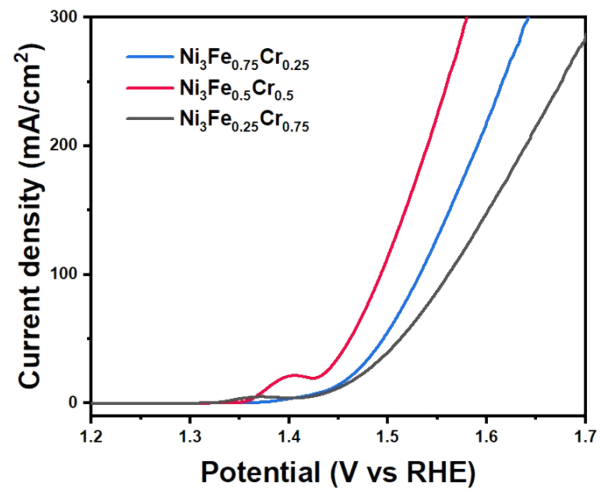

**Fig S7.**OER polarization curves of Ni<sub>3</sub>Fe<sub>1-x</sub>Cr<sub>x</sub>-NH<sub>3</sub> (x=0.25, 0.5, 0.75) with 90 % iR correction at a scan rate of 10 mV/s in 1.0 M KOH.



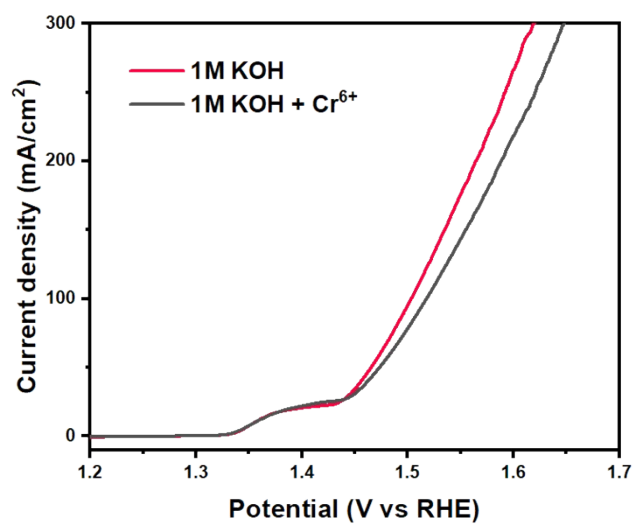

**Fig S8.** OER polarization curves of  $\text{Ni}_3\text{Fe}_{0.5}\text{Cr}_{0.5}\text{-NH}_3$  with 90 % iR correction at a scan rate of 10 mV/s in 1.0 M KOH and 1.0 M KOH with  $\text{Cr}^{6+}$ .

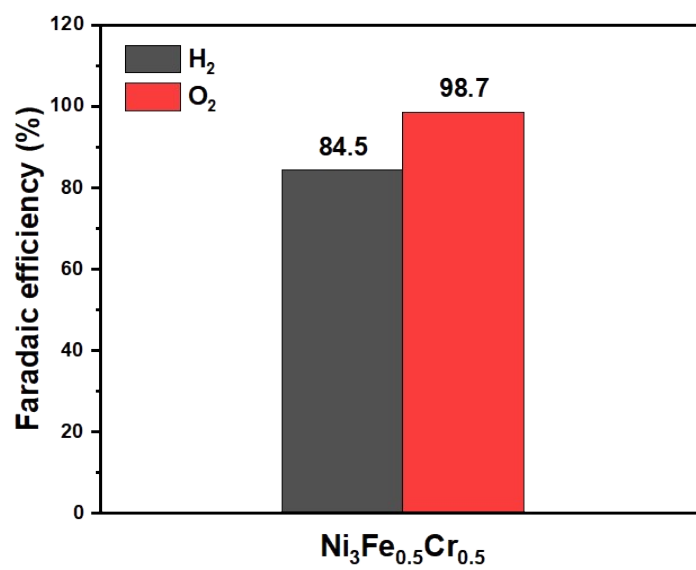

Fig S9. The faradaic efficiency of Ni<sub>3</sub>Fe<sub>0.5</sub>Cr<sub>0.5</sub>-NH<sub>3</sub>.

**Table S1.** Compositions of the samples determined by ICP-AES.

| Samples                                     | The content of metal ions<br>(mmol/L) |        |        | Mole ratio |      |       |
|---------------------------------------------|---------------------------------------|--------|--------|------------|------|-------|
|                                             | Ni                                    | Fe     | Cr     | Ni         | Fe   | Cr    |
| $\text{Ni}_3\text{Fe}_{0.5}\text{Cr}_{0.5}$ | 1.20                                  | 0.21   | 0.18   | 3.08       | 0.54 | 0.46  |
| After 10h OER                               | 0.2835                                | 0.0500 | 0.0047 | 3.06       | 0.54 | 0.051 |
| After 20h OER                               | 0.1894                                | 0.0340 | 0.0033 | 2.99       | 0.54 | 0.05  |

**Table S2.** Concentrations of Cr Fe and Ni for Ni<sub>3</sub>Fe<sub>0.5</sub>Cr<sub>0.5</sub>-NH<sub>3</sub> after operating in different electrolytes, as shown in Fig 5b, determined by the atomic absorption spectrum.

|                                                        | <b>0-10h OER</b> | <b>10-20h OER</b> |
|--------------------------------------------------------|------------------|-------------------|
| <b>Concentration of Cr(<math>\mu\text{g/L}</math>)</b> | 237.66           | ND                |
| <b>Concentration of Fe(<math>\mu\text{g/L}</math>)</b> | ND               | ND                |
| <b>Concentration of Ni(<math>\mu\text{g/L}</math>)</b> | ND               | ND                |

**Table S3.** Comparison of the OER performance of Ni<sub>3</sub>Fe<sub>0.5</sub>Cr<sub>0.5</sub>-NH<sub>3</sub> to the recently reported Cr-NiFe catalysts.

| Catalyst                                                             | Electrolyte | Substrates      | Method            | j (mA cm <sup>-2</sup> ) | η (mV) | Reference |
|----------------------------------------------------------------------|-------------|-----------------|-------------------|--------------------------|--------|-----------|
| Ni <sub>3</sub> Fe <sub>0.5</sub> Cr <sub>0.5</sub> -NH <sub>3</sub> | 1.0 M KOH   | Carbon paper    | Dropping          | 25                       | 209    | This work |
|                                                                      |             |                 |                   | 50                       | 232    |           |
| NiFeCr-LDH                                                           | 1.0 M KOH   | Ni foam         | Dropping          | 100                      | 242    | [1]       |
| NiFeCr-LDH/MoS <sub>2</sub>                                          | 1.0 M KOH   | glassy carbon   | Dropping          | 10                       | 270    | [2]       |
| NiFeCr LDH                                                           | 1.0 M KOH   | Carbon paper    | In situ growth    | 25                       | 225    | [3]       |
| h-NiFeCr                                                             | 1.0 M KOH   | Ni foam         | Electrodeposition | 10                       | 220    | [4]       |
| NiFeCr                                                               | 1.0 M KOH   | Ni foam         | Electrodeposition | 100                      | 260    | [5]       |
| Cr <sub>1</sub> /FeNi-LDH                                            | 1.0 M KOH   | stainless steel | Electrodeposition | 10                       | 202    | [6]       |
| CS-NiFeCr                                                            | 1.0 M KOH   | Copper foil     | Electrodeposition | 10                       | 200    | [7]       |
|                                                                      |             |                 |                   | 50                       | 230    |           |

## References

1. Wang, M. H.; Lou, Z. X.; Wu, X.; Liu, Y.; Zhao, J. Y.; Sun, K. Z.; Li, W. X.; Chen, J.; Yuan, H. Y.; Zhu, M.; Dai, S.; Liu, P. F.; Yang, H. G., *Small* **2022**, *18*, e2200303.
2. Chen, S.; Yu, C.; Cao, Z.; Huang, X.; Wang, S.; Zhong, H., *Int. J. Hydr. Energy* **2021**, *46*, 7037-7046.
3. Yang, Y.; Dang, L.; Shearer, M. J.; Sheng, H.; Li, W.; Chen, J.; Xiao, P.; Zhang, Y.; Hamers, R. J.; Jin, S., *Adv. Energy Mater* **2018**, *8*, 1703189.
4. Bo, X.; Li, Y.; Hocking, R. K.; Zhao, C., *ACS Appl Mater Interfaces* **2017**, *9*, 41239-41245.
5. Bo, X.; Hocking, R. K.; Zhou, S.; Li, Y.; Chen, X.; Zhuang, J.; Du, Y.; Zhao, C., *Energy Environ. Sci* **2020**, *13*, 4225-4237.
6. Xie, X.; Cao, C.; Wei, W.; Zhou, S.; Wu, X. T.; Zhu, Q. L., *Nanoscale* **2020**, *12*, 5817-5823.
7. Fan, L.; Zhang, P.; Zhang, B.; Daniel, Q.; Timmer, B. J. J.; Zhang, F.; Sun, L. *ACS Energy Lett* **2018**, *3*, 2865-2874.
